# Supplementary material
Source: HighWire-hosted journal article supplement (http://www.jneurosci.org/highwire/filestream/599066/field_highwire_adjunct_files/3/Supplementary_Fig3.pdf)
Supplement: Supplementary_Fig3.pdf [file Supplementary_Fig3.pdf]

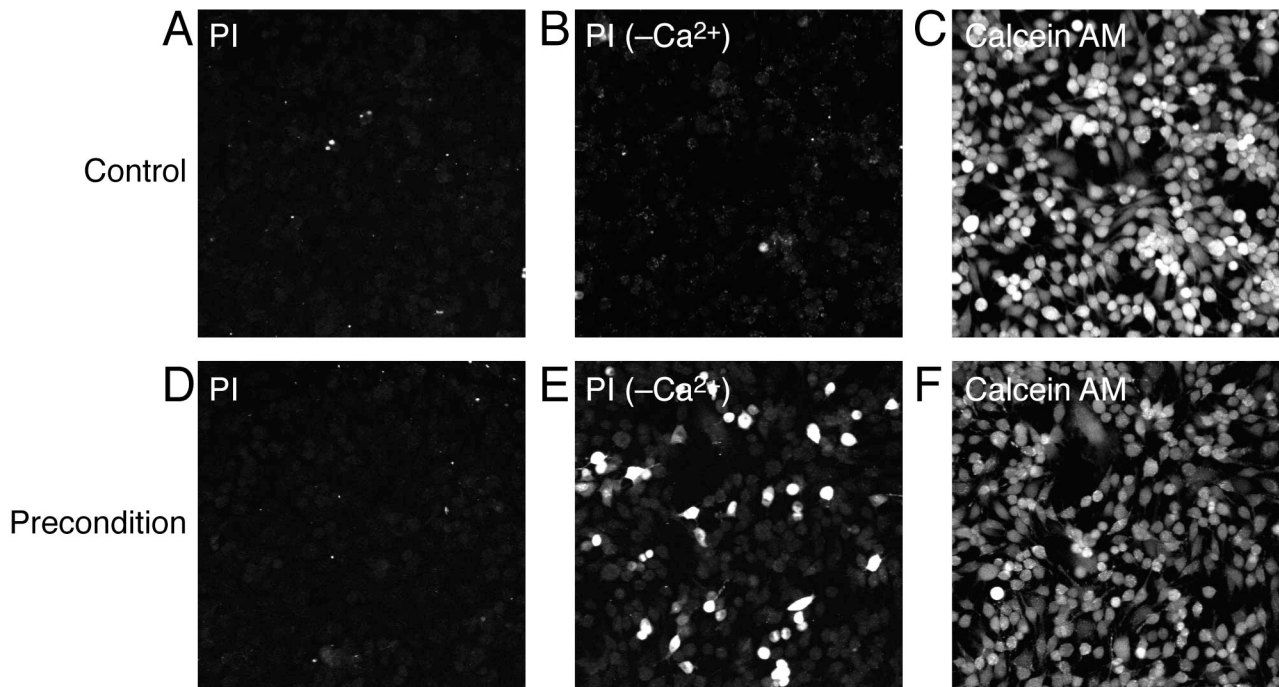

Supplementary Fig. 3

Uptake of PI in C6-Cx43 cells following preconditioning requires exposure to a  $\text{Ca}^{2+}$ -free solution and does not reflect loss of viability. (A) Representative example of PI uptake in control C6-Cx43+ cells prior to exposure to a low  $\text{Ca}^{2+}$  solution. (B) Same culture after exposure to a low  $\text{Ca}^{2+}$  solution, and (C) uptake of the viability indicator calcein AM (2  $\mu\text{M}$ ) in the same field as B. (D) Uptake of PI in a C6-Cx43+ culture exposed to a preconditioning stimulation prior to exposure to a low  $\text{Ca}^{2+}$  solution. (E) Uptake of PI after exposure to a low  $\text{Ca}^{2+}$  solution. A marked increase in PI uptake is noted. (F) Calcein AM (2  $\mu\text{M}$ ) in the same field shows that the cells are viable and able to retain calcein.
